# Supplementary material for: A functional genomics pipeline identifies pleiotropy and cross-tissue effects within obesity-associated GWAS loci
Source: PubMed Central journal article supplement (PMC8421397; doi:10.1038/s41467-021-25614-3), 2021-09-06

1 Supplementary Figure Legends

2 Supplementary Figure 1: Differentiation markers

3 a) Representative images during differentiation of SGBS adipocytes along with expression  
4 for several marker genes during the four time points ( $n = 3$  replicates, data shown are mean  
5 expression estimates  $\pm$  SD). b) Representative images during differentiation of iPSC derived  
6 hypothalamic neurons along with expression of several marker genes during the three time  
7 points ( $n = 3$  replicates, data shown are mean expression estimates  $\pm$  SD).

8

9 Supplementary Figure 2: Features of functional annotations

10 a) Six fuzzy-c means clusters were identified for adipose and b) hypothalamic DEGs from  
11 the RNA-seq time course. The number of genes comprising each cluster, along with scaled  
12 expression across the time points is shown. c) Overview of median interaction length and  
13 number of interactions per time-point in the replicate-merged cHi-C datasets. Number of  
14 ATAC-seq peaks from the replicate-merged time points. d) Bar plot depicting proportion of  
15 promoter-promoter interactions in merged cHi-C libraries. e,f) The promoter-distal ends of  
16 interactions are enriched for functional ChIP-seq peaks and ATAC-seq peaks compared to a  
17 distribution of randomly chosen, number-matched set of non-promoter Mbol fragments  
18 within mappable genomic regions ( $n = 100$  iterations). The fold change of the observed  
19 overlap over 100 randomized sets is presented. ChIP-seq datasets were obtained from  
20 Adipose Nuclei (E063) and Fetal Brain (E081) repositories from the Roadmap Epigenomics  
21 project. (\*  $p < 0.05$ ; two-sided Z-test) Data shown as the average of the 100 randomizations  $\pm$   
22 SD g) Genes were binned based on upregulation or downregulation across each time point.  
23 Plotted are the changes in interaction score or normalized ATAC-seq reads for ATAC peaks  
24 connected through these genes via a significant cHi-C peak between each time point.  
25 boxplot center line, median; box limits, upper and lower quartiles; whiskers, 1.5x  
26 interquartile range; outliers not shown \* $p < 0.05$ ; two-sided Mann-Whitney U test. Adipose  
27 values for each bin (Day 0-2)  $n = 2,205$  up,  $n = 3,998$  down,  $n = 26,752$  not DE; (Day 2-8)  $n =$   
28  $653$  up,  $n = 717$  down,  $n = 31,575$  not DE, (Day 8-16)  $n = 545$  up,  $n = 849$  down,  $n = 31,551$   
29 not DE; Neuron values for each bin (Day 12-16)  $n = 1,588$  up,  $n = 2,457$  down,  $n = 20,726$   
30 not DE; (Day 16-27)  $n = 1,495$  up,  $n = 363$  down,  $n = 22,913$  not DE.

31

32 Supplementary Figure 3: Characterizing Adipocyte Differentiation using Genomic  
33 Annotations

34 a) Time points for data collection b) Adipose DEGs were grouped via fuzzy-c means  
35 clustering and the top three clusters with highest membership scores are illustrated. The  
36 number of genes in each cluster and scaled expression across the four differentiation time  
37 points is depicted. c) Significant KEGG pathway terms identified using Enrichr for the top  
38 three clusters (Fisher's Exact Test;  $p$  values are adjusted for multiple tests). d) Heatmap of  
39 gene expression depicting genes from each of the top three clusters that are members of the  
40 enriched KEGG pathway terms. The leftmost colored bar indicates cluster membership and  
41 each column is an RNA-seq replicate. e-g) HSV transformation of expressed genes, ATAC-seq  
42 peaks, and cHi-C interactions across differentiation. The three nodes of each pattern  
43 represent day 0, day 2, and day 16 of adipose differentiation. The distance of each point  
44 from the center of the circle represents maximum  $\log_2$  fold change, and color transparency  
45 represents the relative number of reads for that data point. Below, heatmaps of Pearson's  $r$

46 correlation coefficients estimate overall similarity between time points. h) On average, a  
47 promoter interacts with 3-4 ATAC-seq peaks via a cHi-C interaction across time  
48 (interactions and ATAC peaks were not required to be significant at the same time point). i)  
49 View of cHi-C interactions from the promoter of the *IRS2* gene, which becomes upregulated  
50 between differentiation days 0-2. ATAC-seq reads and peaks from day 0 and day 2 are also  
51 shown.

52

53 Supplementary Figure 4: MPRA enhancer activity is supported

54 a) MPRA enhancers are enriched for Epigenome Roadmap's 15 state ChromHMM functional  
55 marks in adipose nuclei or fetal brain compared to all tested variants b) MPRA enhancers  
56 are enriched for presence in cHi-C interactions, number of interactions per enhancer, and  
57 open chromatin compared to non-significant regions. (\* $p < 0.05$ ; two-sided Student's  $t$ -test)  
58 c) Luciferase assay results for ~1 kb sized regions containing an EMVar. Regions were  
59 chosen at random, and represent a full spectrum of MPRA enhancer  $p$  values. Because of  
60 this, non-EMVar rs1026737 and rs10000940 were included because they had very low and  
61 high enhancer  $p$  values, respectively. If the allele that was captured was not a significant  
62 enhancer, the result is colored with a grey background. Interestingly, for the rs4430895  
63 region, we were able to clone both alleles, and although neither allele was an enhancer  
64 using the luciferase assay, the allele predicted to be stronger with MPRA had higher Luc2  
65 expression compared to the weak allele.  $n = 9$  independent replicates for all constructs  
66 except  $n = 12$  independent replicates for rs2836753\_G, rs1800437\_G, rs6091542\_T +  
67 rs6096971\_A + rs6096972\_G, rs3800231\_T, rs41303827\_G, rs843812\_A, rs7146955\_A,  
68 rs7030846\_T, rs1406256\_C, rs78575557\_A and rs794364\_A tested in in 3T3-L1 cells.  
69 boxplot center line, median; box limits, upper and lower quartiles; whiskers, 1.5x  
70 interquartile range. rs794364\_A\_3T3  $p = 4.8e-3$ ; rs794364\_A\_HT22  $p = 4.7e-3$ ;  
71 rs7146955\_A\_HT22  $p = 1.1e-3$ ; rs56358680\_A\_HT22  $p = 2.3e-4$ ; rs56358680\_A\_3T3  $p =$   
72  $1.7e-3$ ; rs4788211\_A\_HT22  $p = 8.5e-5$ ; rs4788211\_A\_3T3  $p = 3.8e-6$ ; rs2382538\_A\_3T3  $p =$   
73  $7.0e-4$ ; rs2382538\_A\_HT22  $p = 1.96e-8$ ; rs1800437\_G\_3T3  $p = .02$ ; rs1800437\_G\_HT22  $p =$   
74  $7.72e-6$ ; rs13204087\_C + rs13220728\_T\_3T3  $p = 1.8e-4$ ; rs13204087\_C +  
75 rs13220728\_T\_HT22  $p = 8.4e-5$ ; rs116735807\_T\_3T3  $p = 3.3e-3$ ; rs116735807\_T\_HT22  $p =$   
76  $2.3e-10$ ; rs1026737\_T\_HT22  $p = 2.0e-4$ ; rs1026737\_T\_3T3  $p = 2.6e-7$ ; rs3800231\_T\_3T3  $p =$   
77  $7.0e-3$

78

79 Supplementary Figure 5: Transcription factors in obesity associated loci and additional  
80 analysis of chromosome 16

81 a) (left) Position weight matrices and identifiers for enriched transcription factor motifs  
82 from HOMER. Each motif was enriched in either MPRA adipose or brain enhancers (HOMER  
83 adjusted  $p$  value  $< 0.05$ ; Binomial Test). (right) Transcription factors are connected to a BMI  
84 relevant phenotype with a line if these factors play a role in that biological process  
85 (significant in both brain and adipose = grey circle, significant in adipose = yellow, and  
86 significant in brain = blue). b) s-LDSC estimated proportion of total heritability explained  
87 per chromosome is depicted along with heritability enrichment values. data shown are  
88 percent heritability explained  $\pm$  SEM (LD score regression with a block jackknife approach)  
89 c) Number of EMVars compared to the number of variants tested with MPRA stratified per  
90 chromosome.

91

92 Supplementary Figure 6: Haplotype information and SNP specific interactions for *ATP2A1*  
93 locus EMVars

94 a)(left) Summary information for all 10 EMVars identified in both the *SBK1* and *ATP2A1* loci.  
95 Two SNPs in the *SBK1* region were neither eQTLs nor did they participate in cHi-C  
96 interactions and were thus removed from future consideration. (right) Allele frequencies  
97 and haplotype information in the CEU population for all EMVars in the *ATP2A1* locus  
98 (LDhap tool: <https://ldlink.nci.nih.gov>). The lead risk variant, rs3888190-A, is outlined in  
99 blue. b) MPRA allele specific activity levels for EMVars within the *ATP2A1* locus and *SBK1*  
100 locus in adipose or brain libraries. Data presented are the average activity for each barcode  
101 across independent experiments. \*reached  $q < 0.05$  in at least half of all independent  
102 experiments or in both biological replicates. exact  $p$  values per replicate are presented in  
103 the Supplementary Tables; two-sided Mann-Whitney U test. c) Promoter interactions  
104 stemming from each EMVar in the *ATP2A1* locus at any time point in both brain and adipose  
105 cells. Location of variant is indicated by a red line (b,c) Adipose cHi-C data=yellow, Neuronal  
106 cHi-C data = blue

107

108 Supplementary Figure 7: A high level of sharing exists between independent enhancer  
109 deletions

110 a) Venn Diagrams depicting numbers of significantly differentially expressed genes between  
111 enhancer deletions and WT cells at each time point. The Jaccard Index is a representation of  
112 sharing on a scale of 0-1, where 1 is complete sharing and 0 is no sharing. b) Heatmap  
113 showing the Pearson  $r$  correlations between  $\log_2$ FC of all expressed autosomal genes in the  
114 genome for the two enhancer deletion lines compared to WT cells. c) Gene Ontology  
115 enrichments for differentially expressed genes that were significantly upregulated or  
116 downregulated at two time points during the differentiation. Corresponding volcano plots  
117 show directionality and numbers of the differentially expressed genes. (Fishers Exact Test;  
118 FDR adjusted  $p$  values are presented) d) Locations of CRISPRi guides for each condition.  
119 Guides were designed to target the 3'UTR of *SBK1*, the promoter of *GAPDH* as a positive  
120 control, and a region downstream of *TUFM* as a negative control. Cells were transfected and  
121 isolated via FACS based on the presence of either the Cas9 expressing BFP plasmid (BV421-  
122 A) and/or the GFP expressing guide plasmid (FITC-A). The lower left FACS panel represents  
123 cells that were not expressing BFP or GFP as a gating control. The lower middle FACS panel  
124 represents BFP positive cells and the lower right panel represents double positive BFP/GFP  
125 expressing cells.

126

127

128

129

130

131

132

# Supplementary Figure 1

**a**

## Adipose

D0 (1000um)

D2 (400um)

D8 (400um)

D16 (400um)

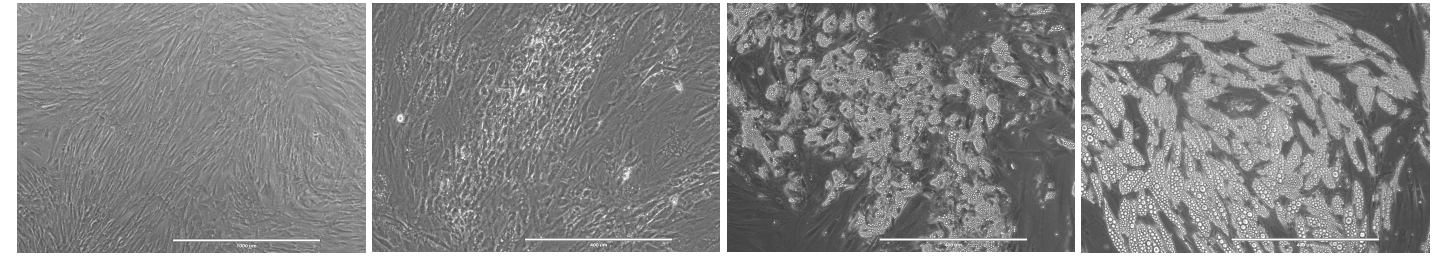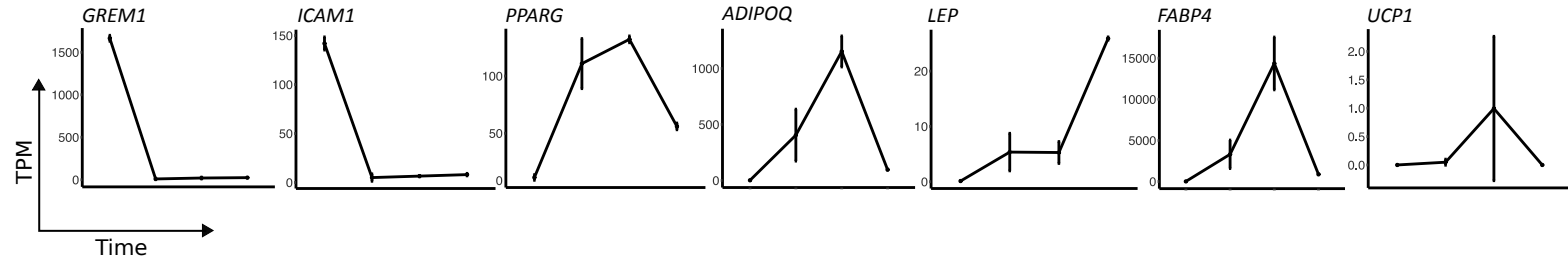

**b**

## Hypothalamic Neurons

D12 (200um)

D16 (200um)

D27 (200um)

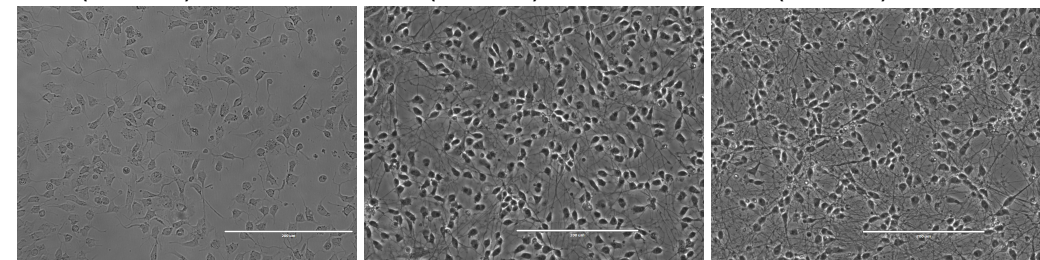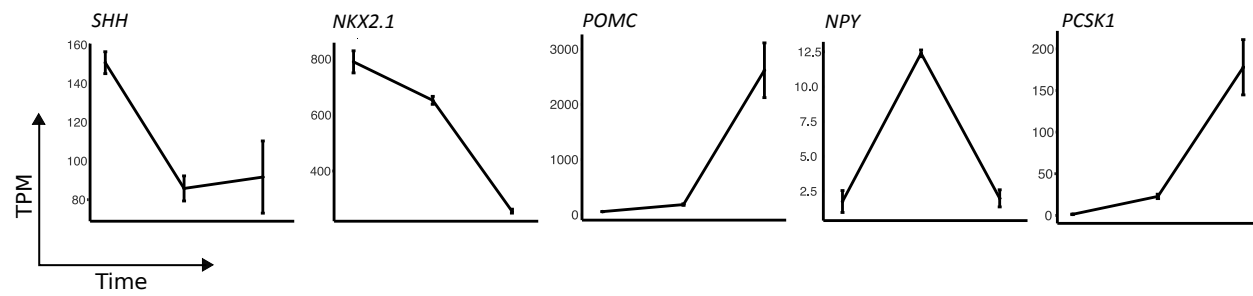



# Supplementary Figure 2

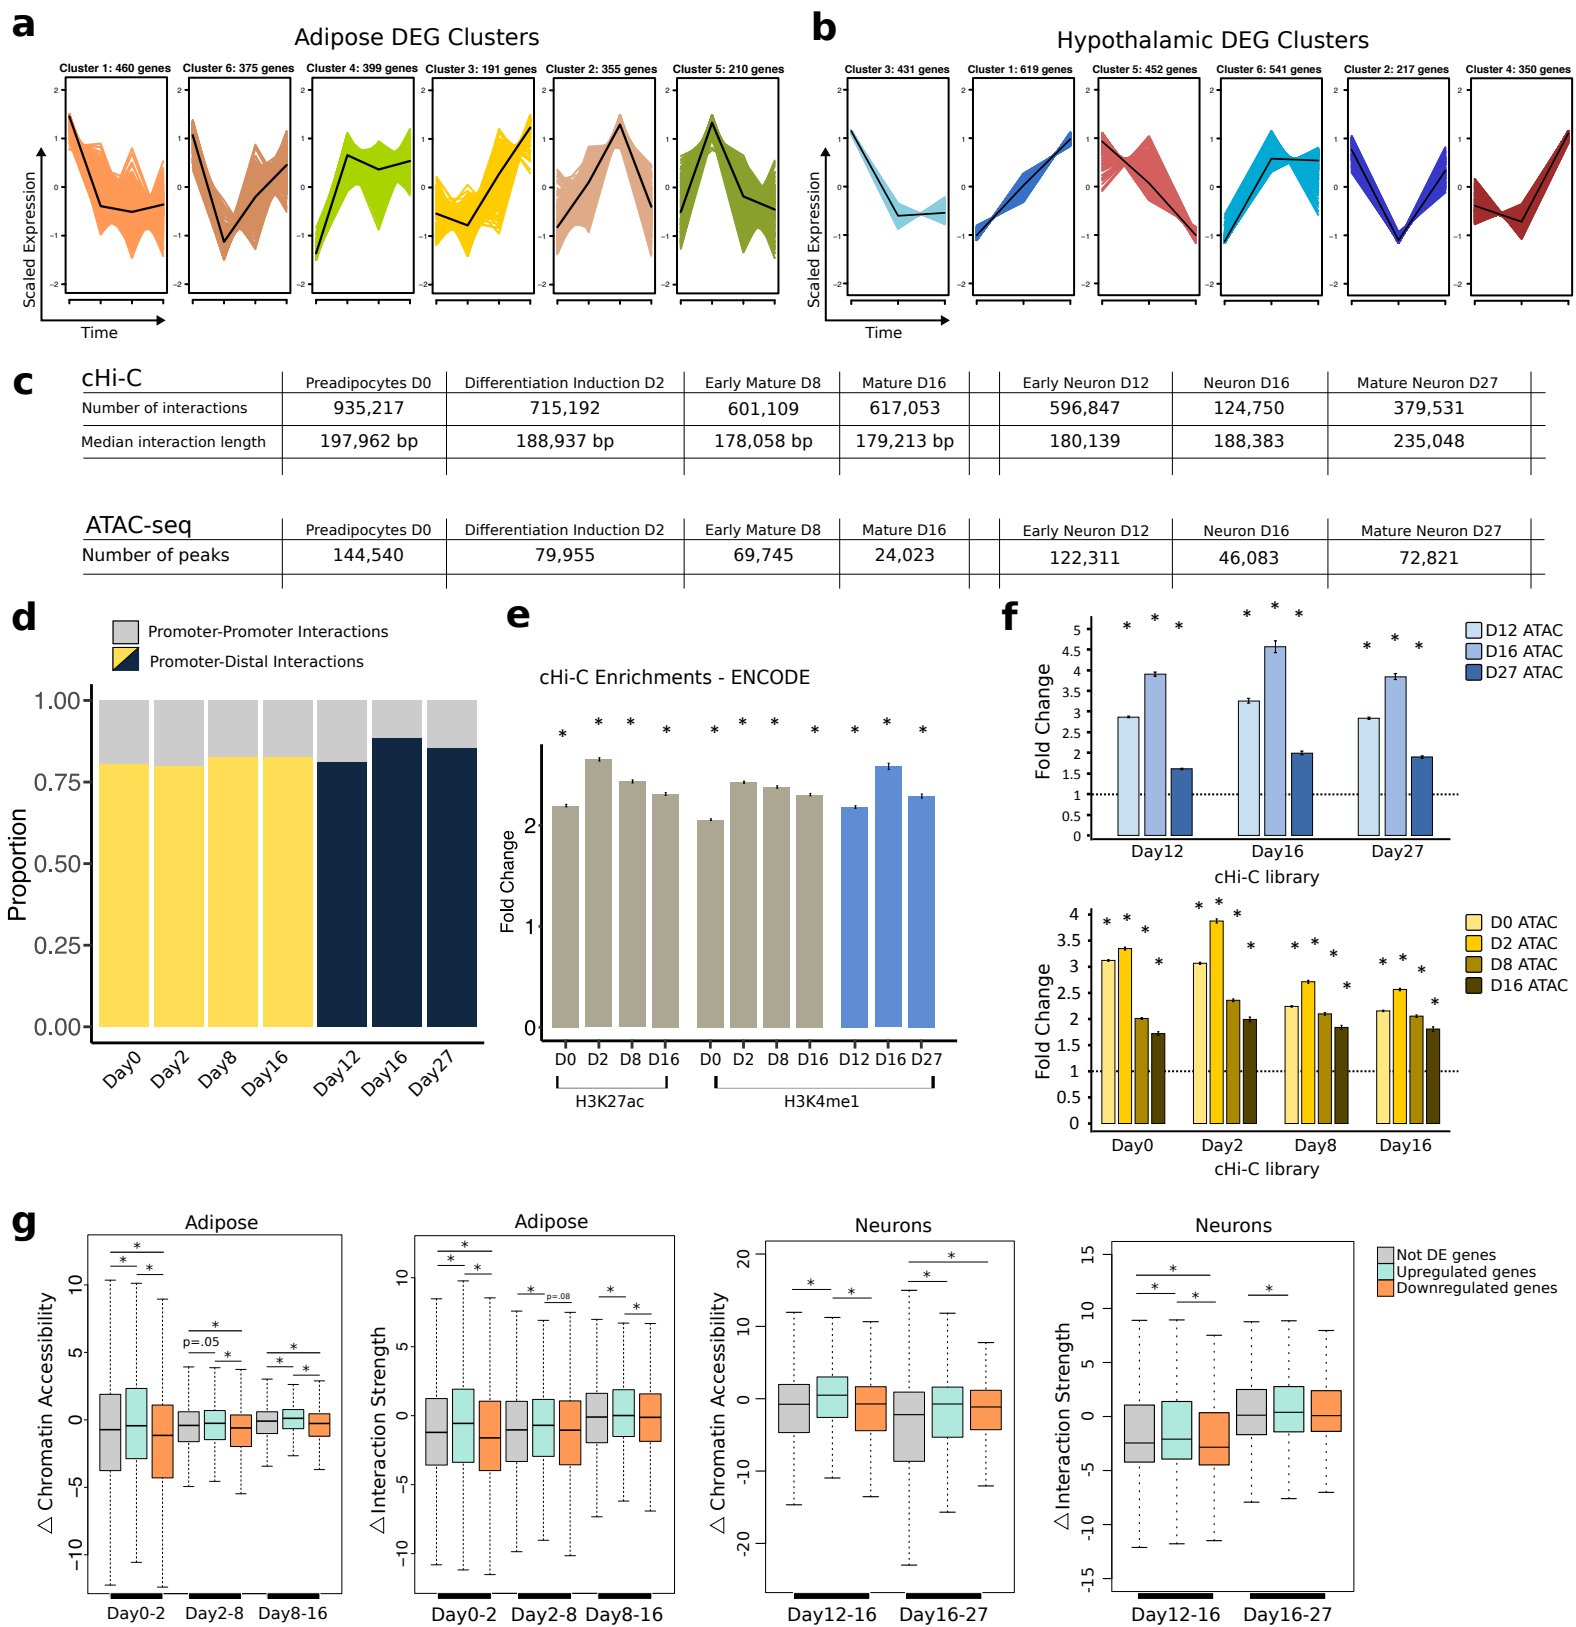

# Supplementary Figure 3

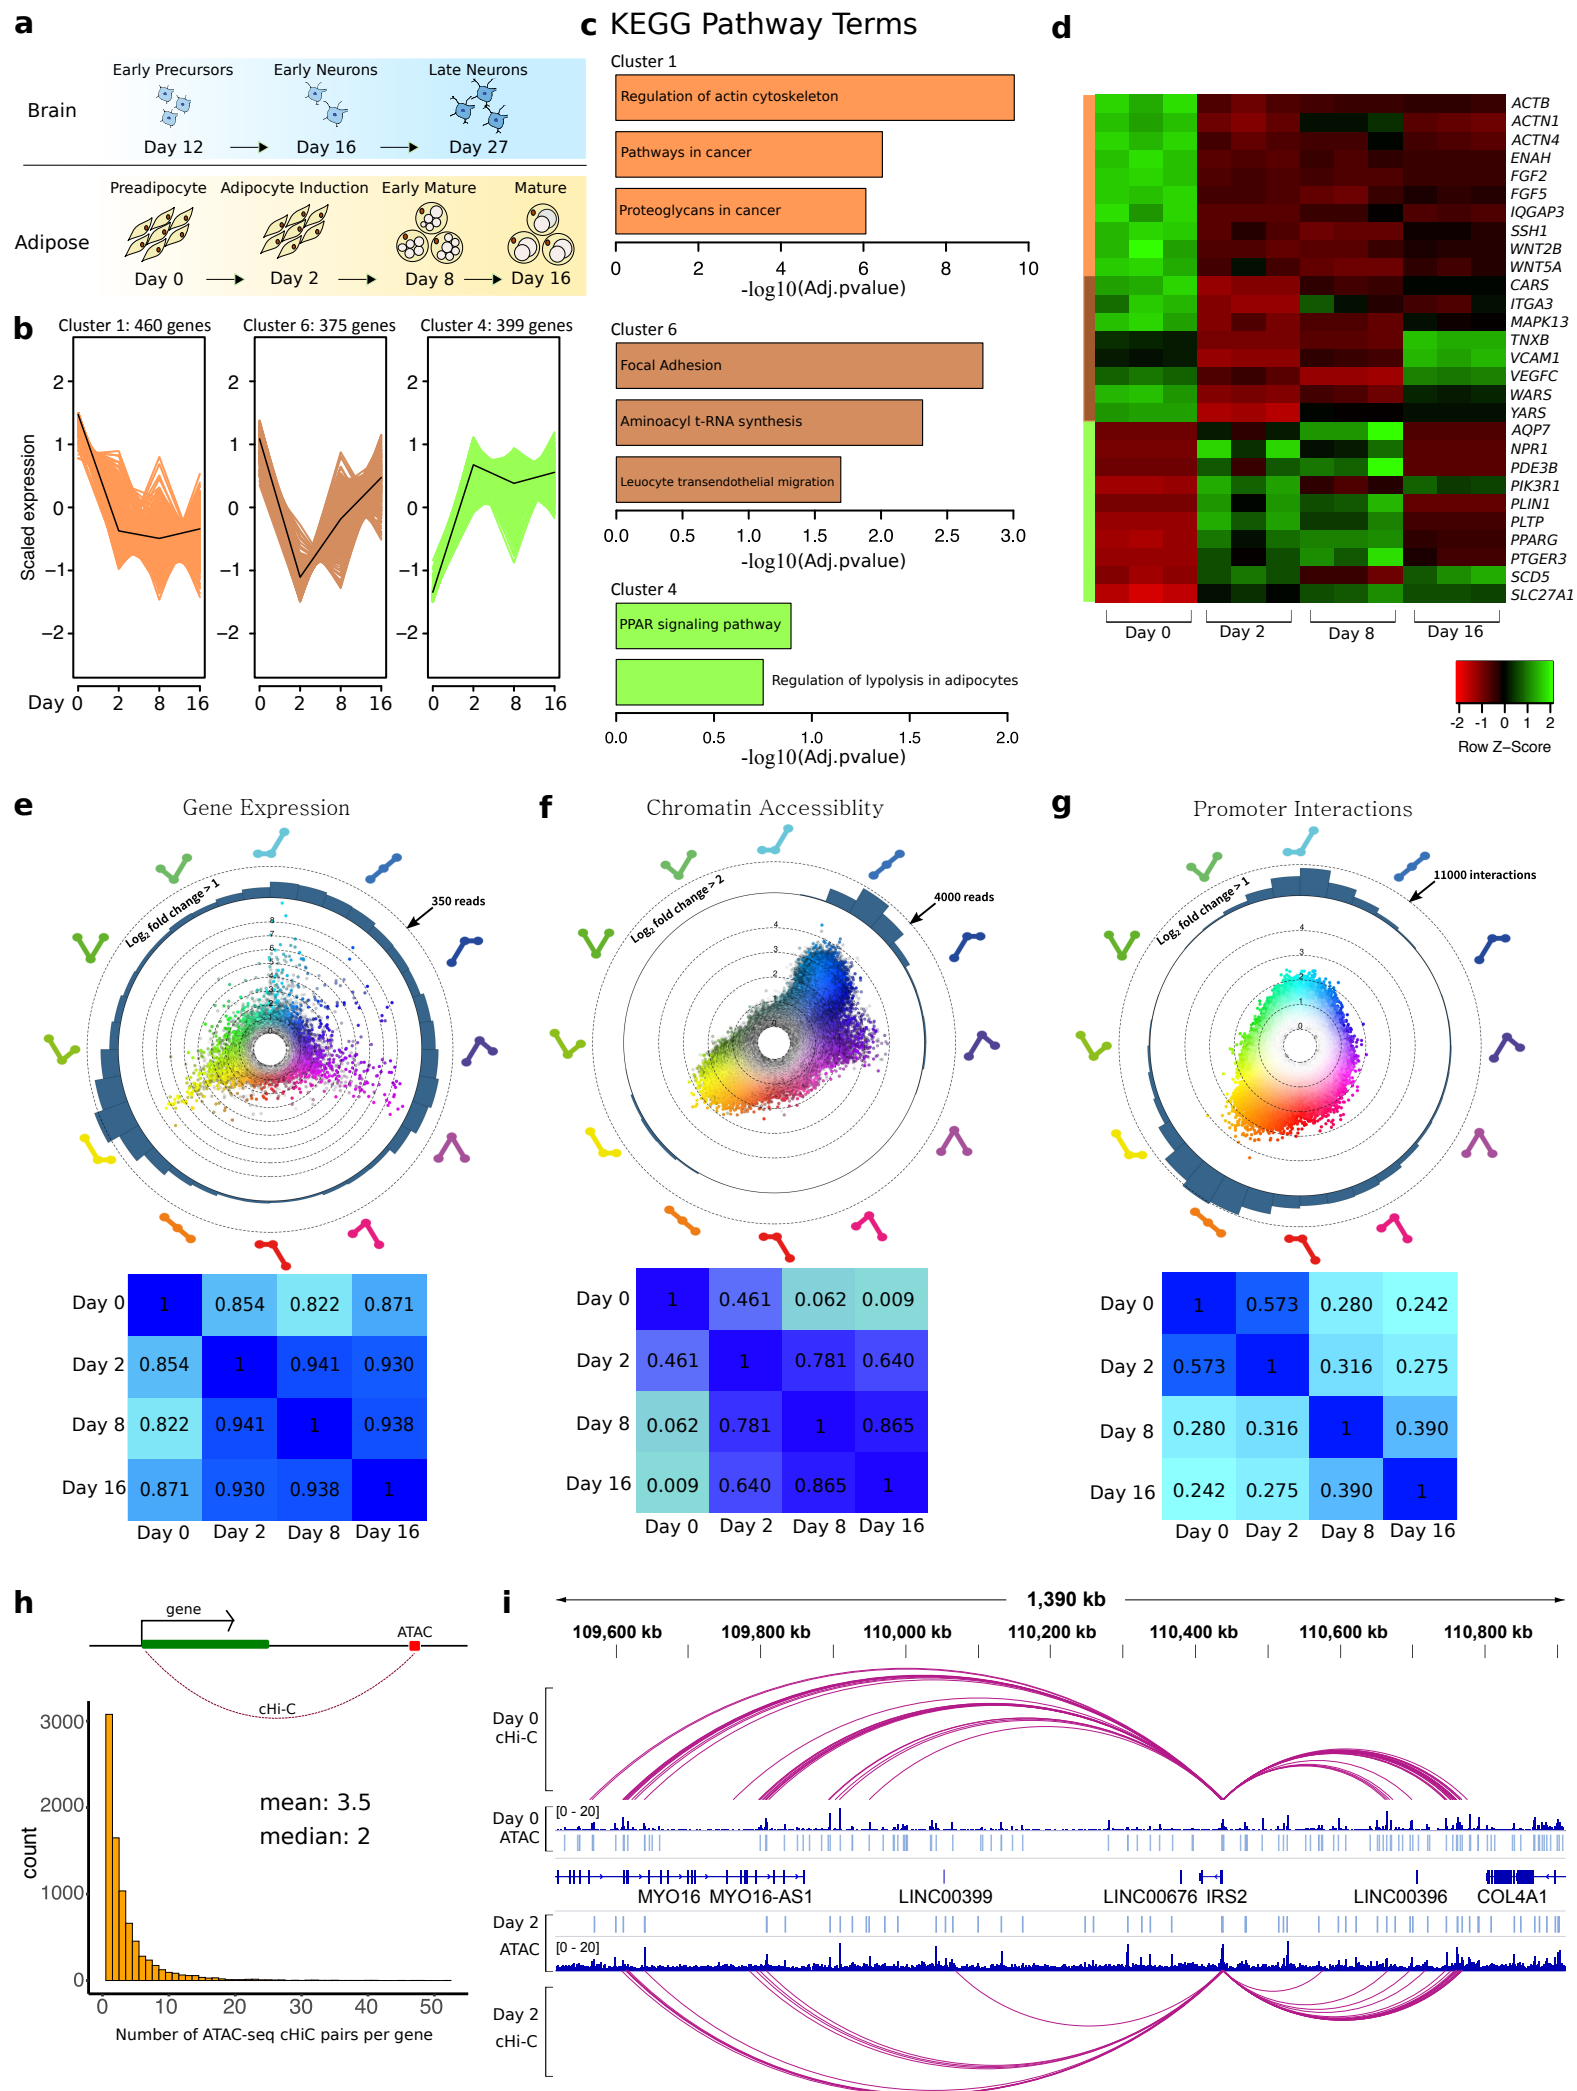

# Supplementary Figure 4

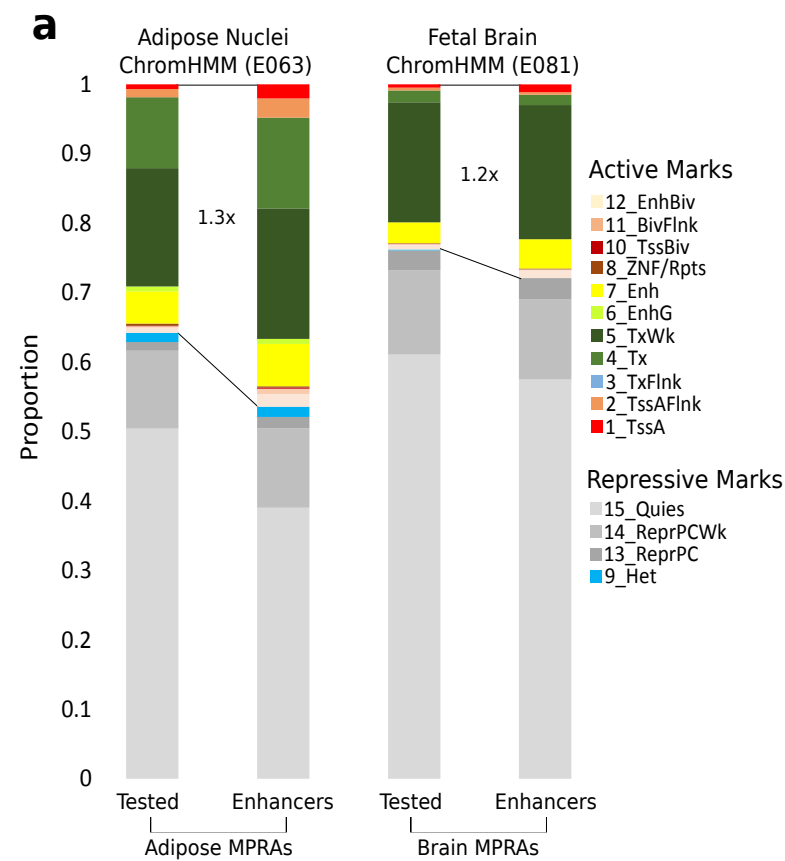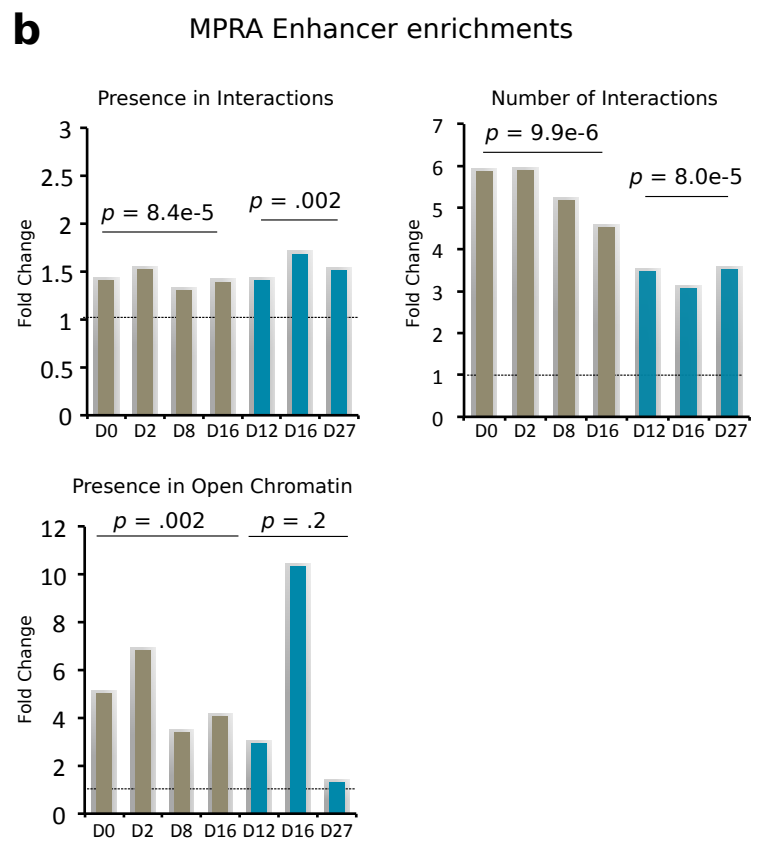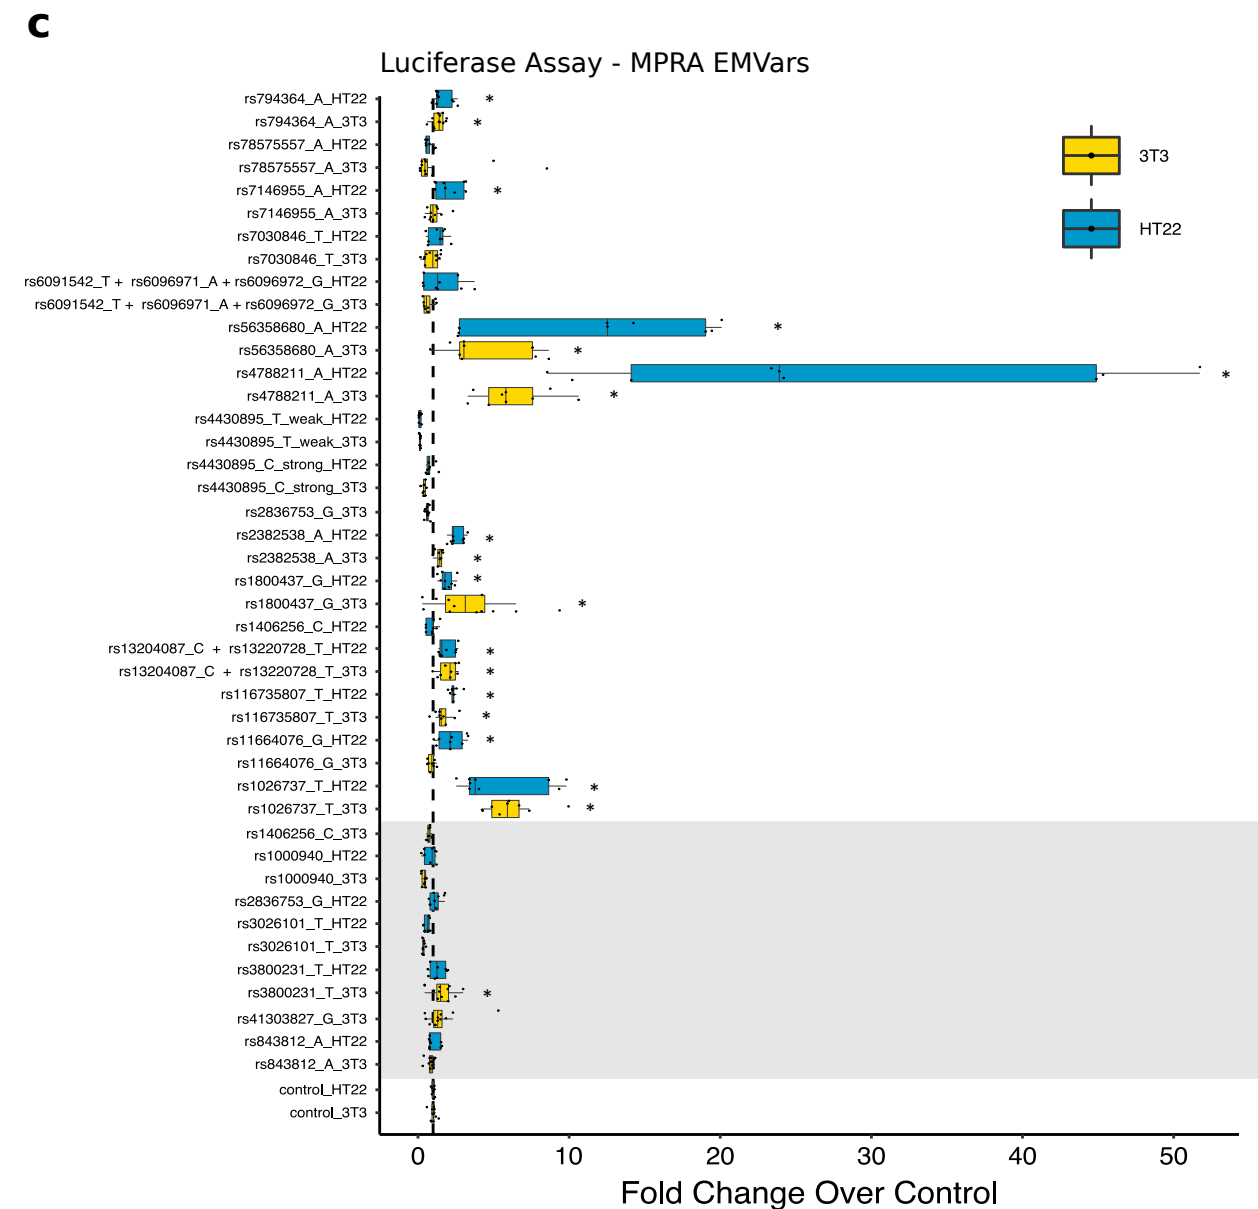

Supplementary Figure 5

**a**

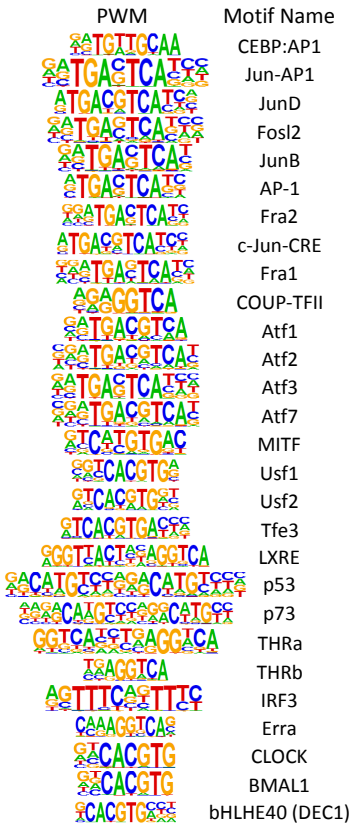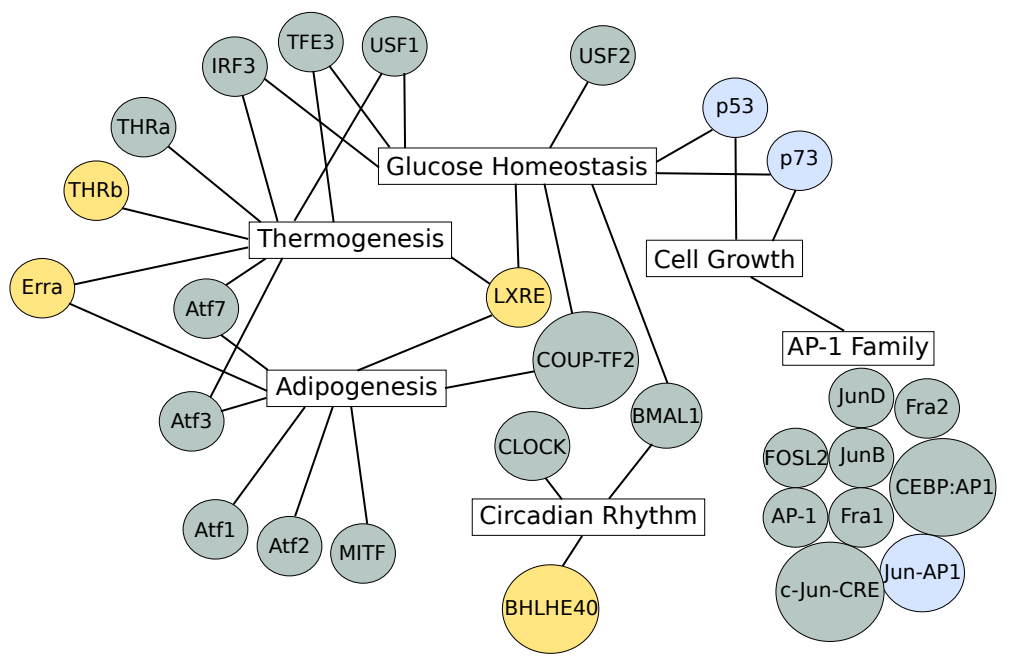

**b**

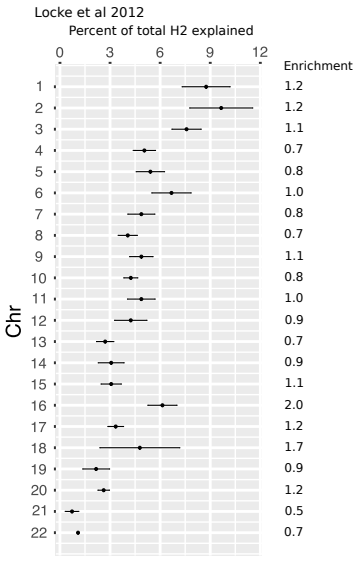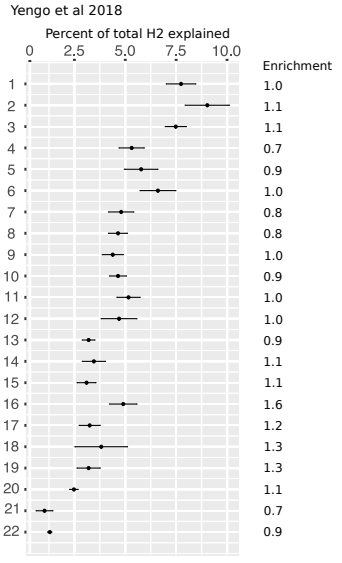

**c**

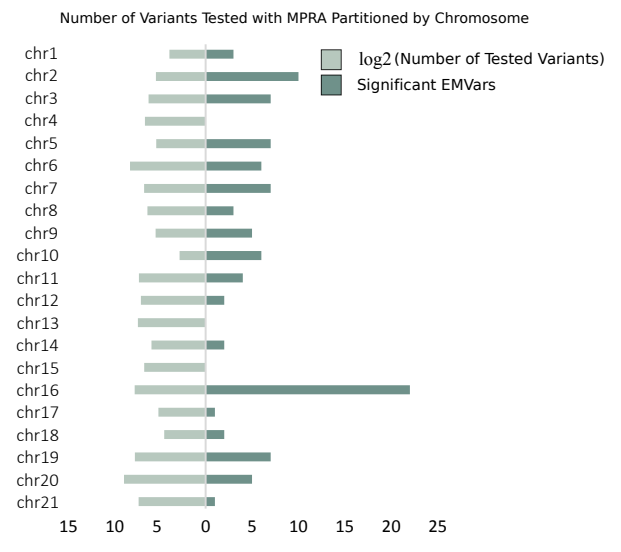

# Supplementary Figure 6

**a**

|              | GTEX eQTL  | chi-C interaction | Brain EMVar | Adipose EMVar |
|--------------|------------|-------------------|-------------|---------------|
| SBKI locus   | rs2650492  | X                 | X           | X             |
|              | rs28685654 |                   |             | X             |
|              | rs6498084  |                   | X           |               |
| ATP2A1 locus | rs56358680 | X                 | X           | X             |
|              | rs57719896 | X                 | X           | X             |
|              | rs9972768  | X                 | X           | X             |
|              | rs4788100  | X                 | X           | X             |
|              | rs12446589 | X                 | X           | X             |
|              | rs7206214  | X                 | X           | X             |
|              | rs62037414 | X                 | X           | X             |

| RS Number  | Position (GRCh37) | Allele Frequencies | Haplotypes |
|------------|-------------------|--------------------|------------|
| rs56358680 | chr16:28843118    | A=0.636, G=0.364   | A G G A    |
| rs55719896 | chr16:28846866    | G=0.636, A=0.364   | G A A G    |
| rs9972768  | chr16:28861734    | A=0.636, C=0.364   | A C C A    |
| rs4788100  | chr16:28864673    | T=0.636, C=0.364   | T C C T    |
| rs12446589 | chr16:28870962    | G=0.636, A=0.364   | G A A G    |
| rs3888190  | chr16:28889486    | C=0.636, A=0.364   | C A A C    |
| rs7206214  | chr16:28919341    | G=0.667, A=0.333   | G A G A    |
| rs62037414 | chr16:28923521    | T=0.672, C=0.328   | T C T C    |

  

| Haplotype Count     | 124    | 63     | 8      | 2      |
|---------------------|--------|--------|--------|--------|
| Haplotype Frequency | 0.6263 | 0.3182 | 0.0404 | 0.0101 |

**b**

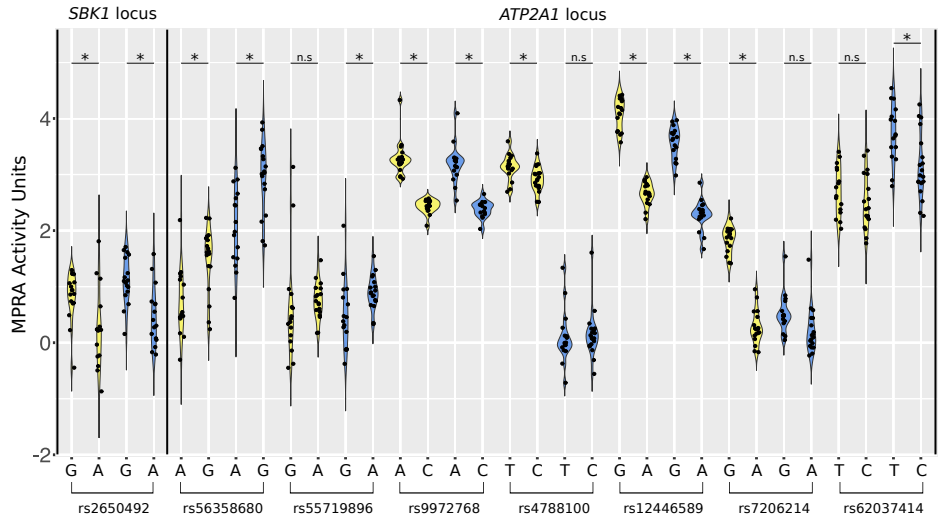

**c**

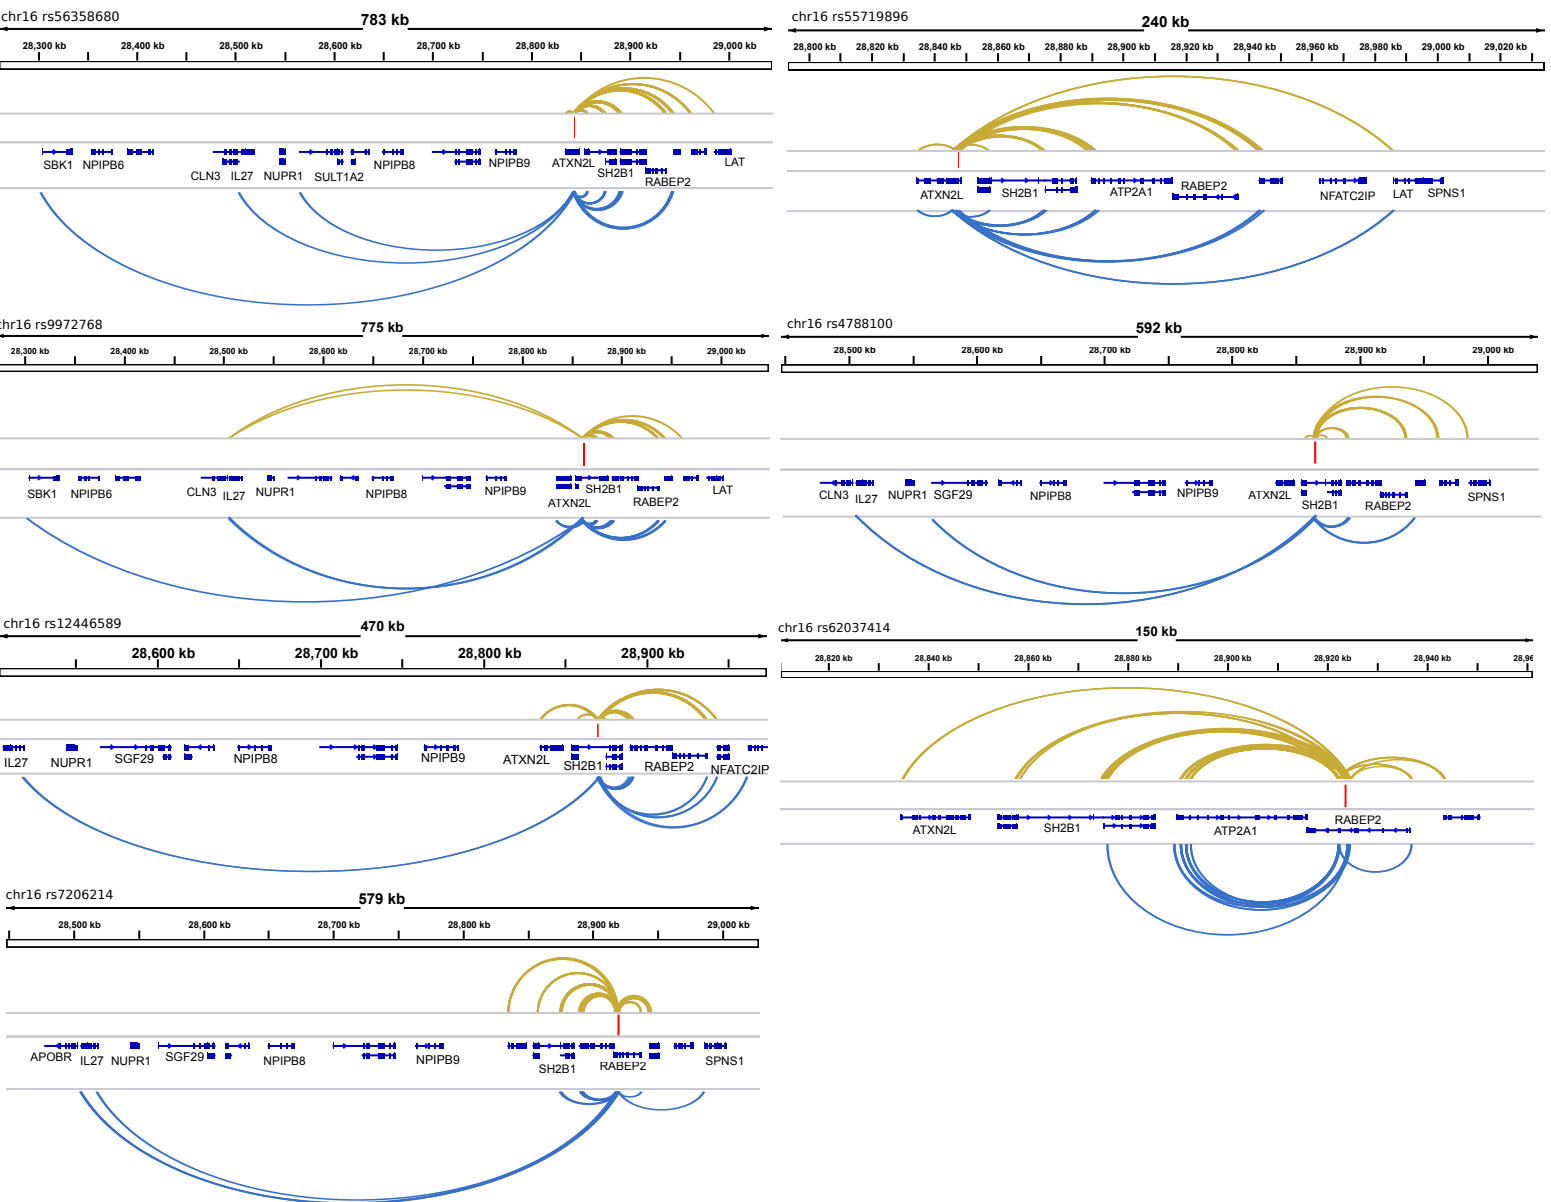

# Supplementary Figure 7

**a**

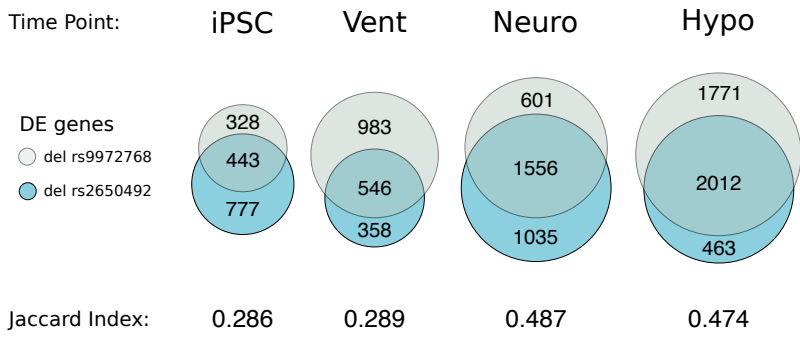

**b**

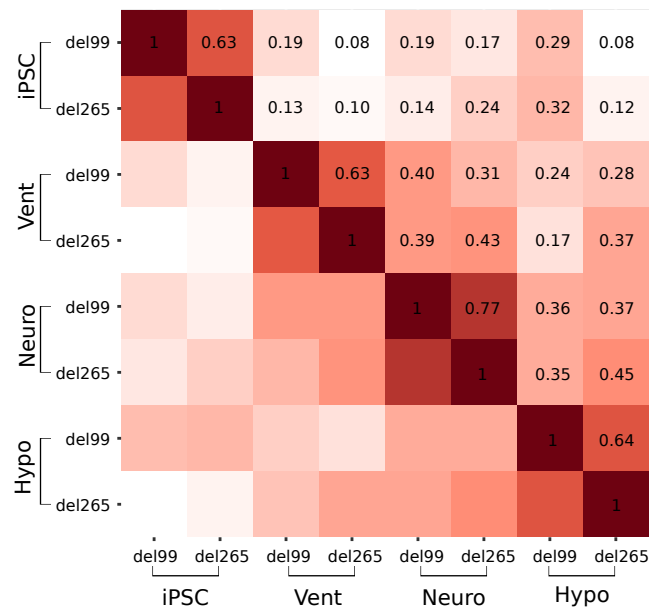

**c**

Vent (TP2)

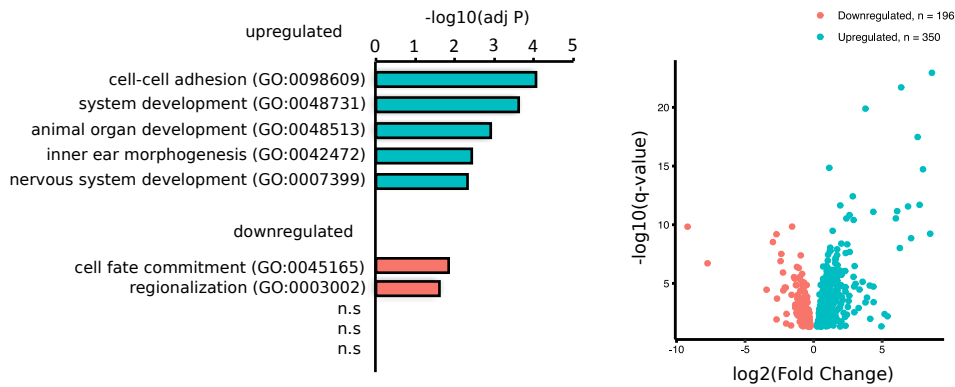

Neuro (TP3)

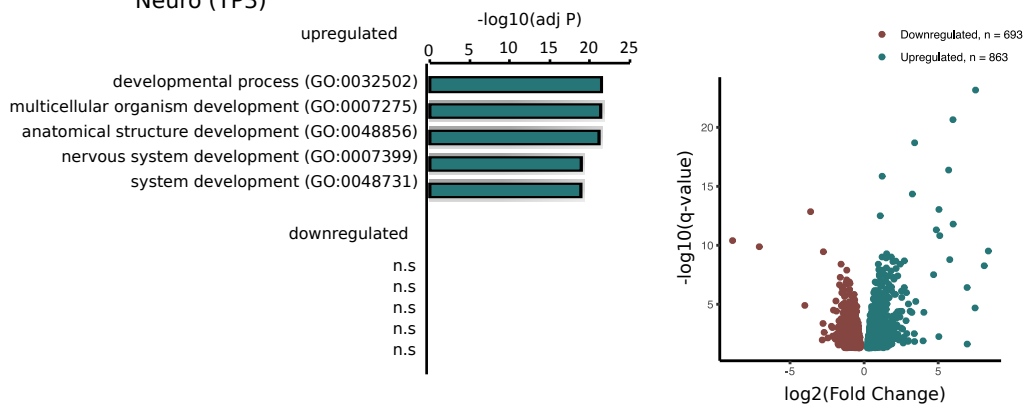

**d**

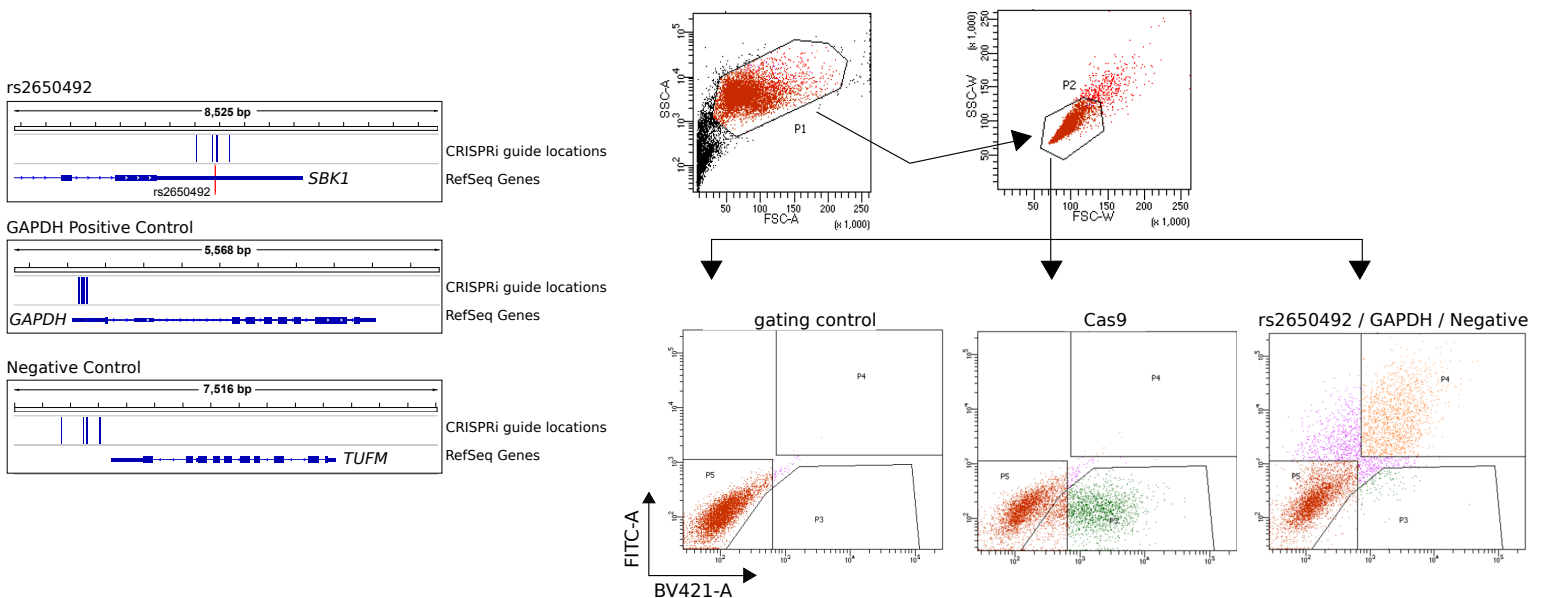

Supplement: 41467_2021_25614_MOESM1_ESM.pdf [file 41467_2021_25614_MOESM1_ESM.pdf]
